# Supplementary figures and images for: The structure of the metastable K18Ta5Zr5F63 phase
Source: Royal Society of Chemistry journal article supplement (doi:10.1039/d0nj02428g), 2020-01-01

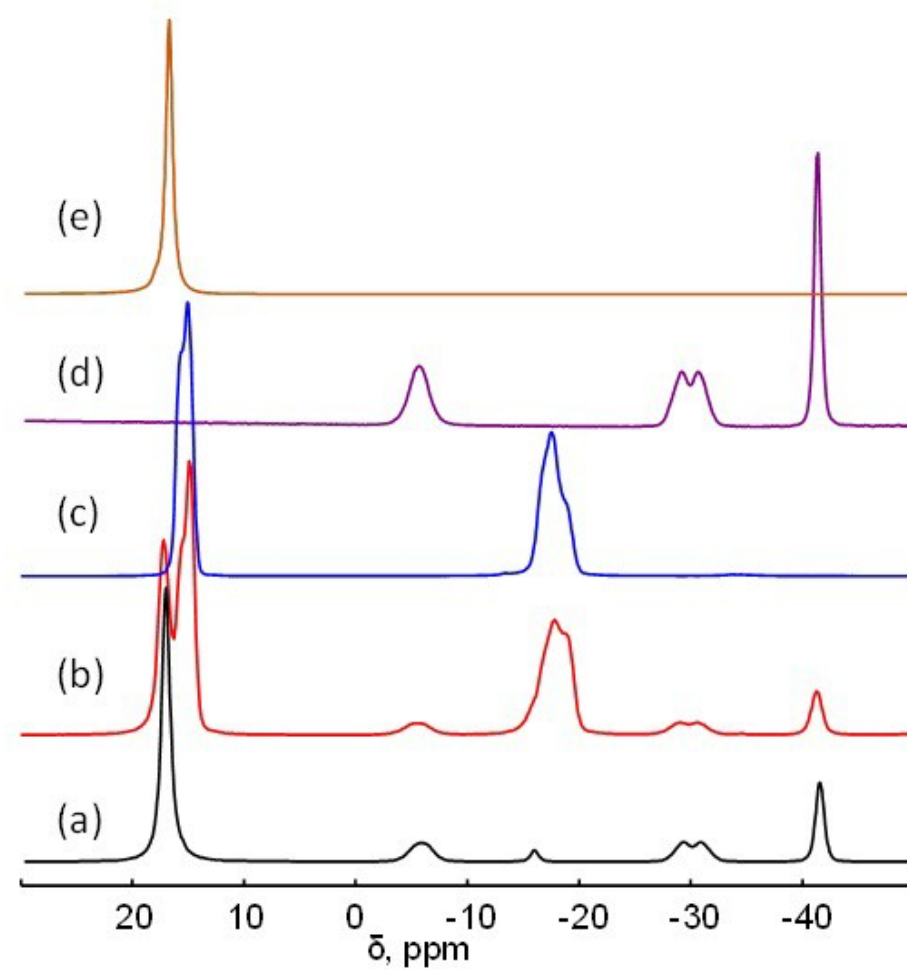

Supplement: d0nj02428g3.pdf [file d0nj02428g3.pdf]

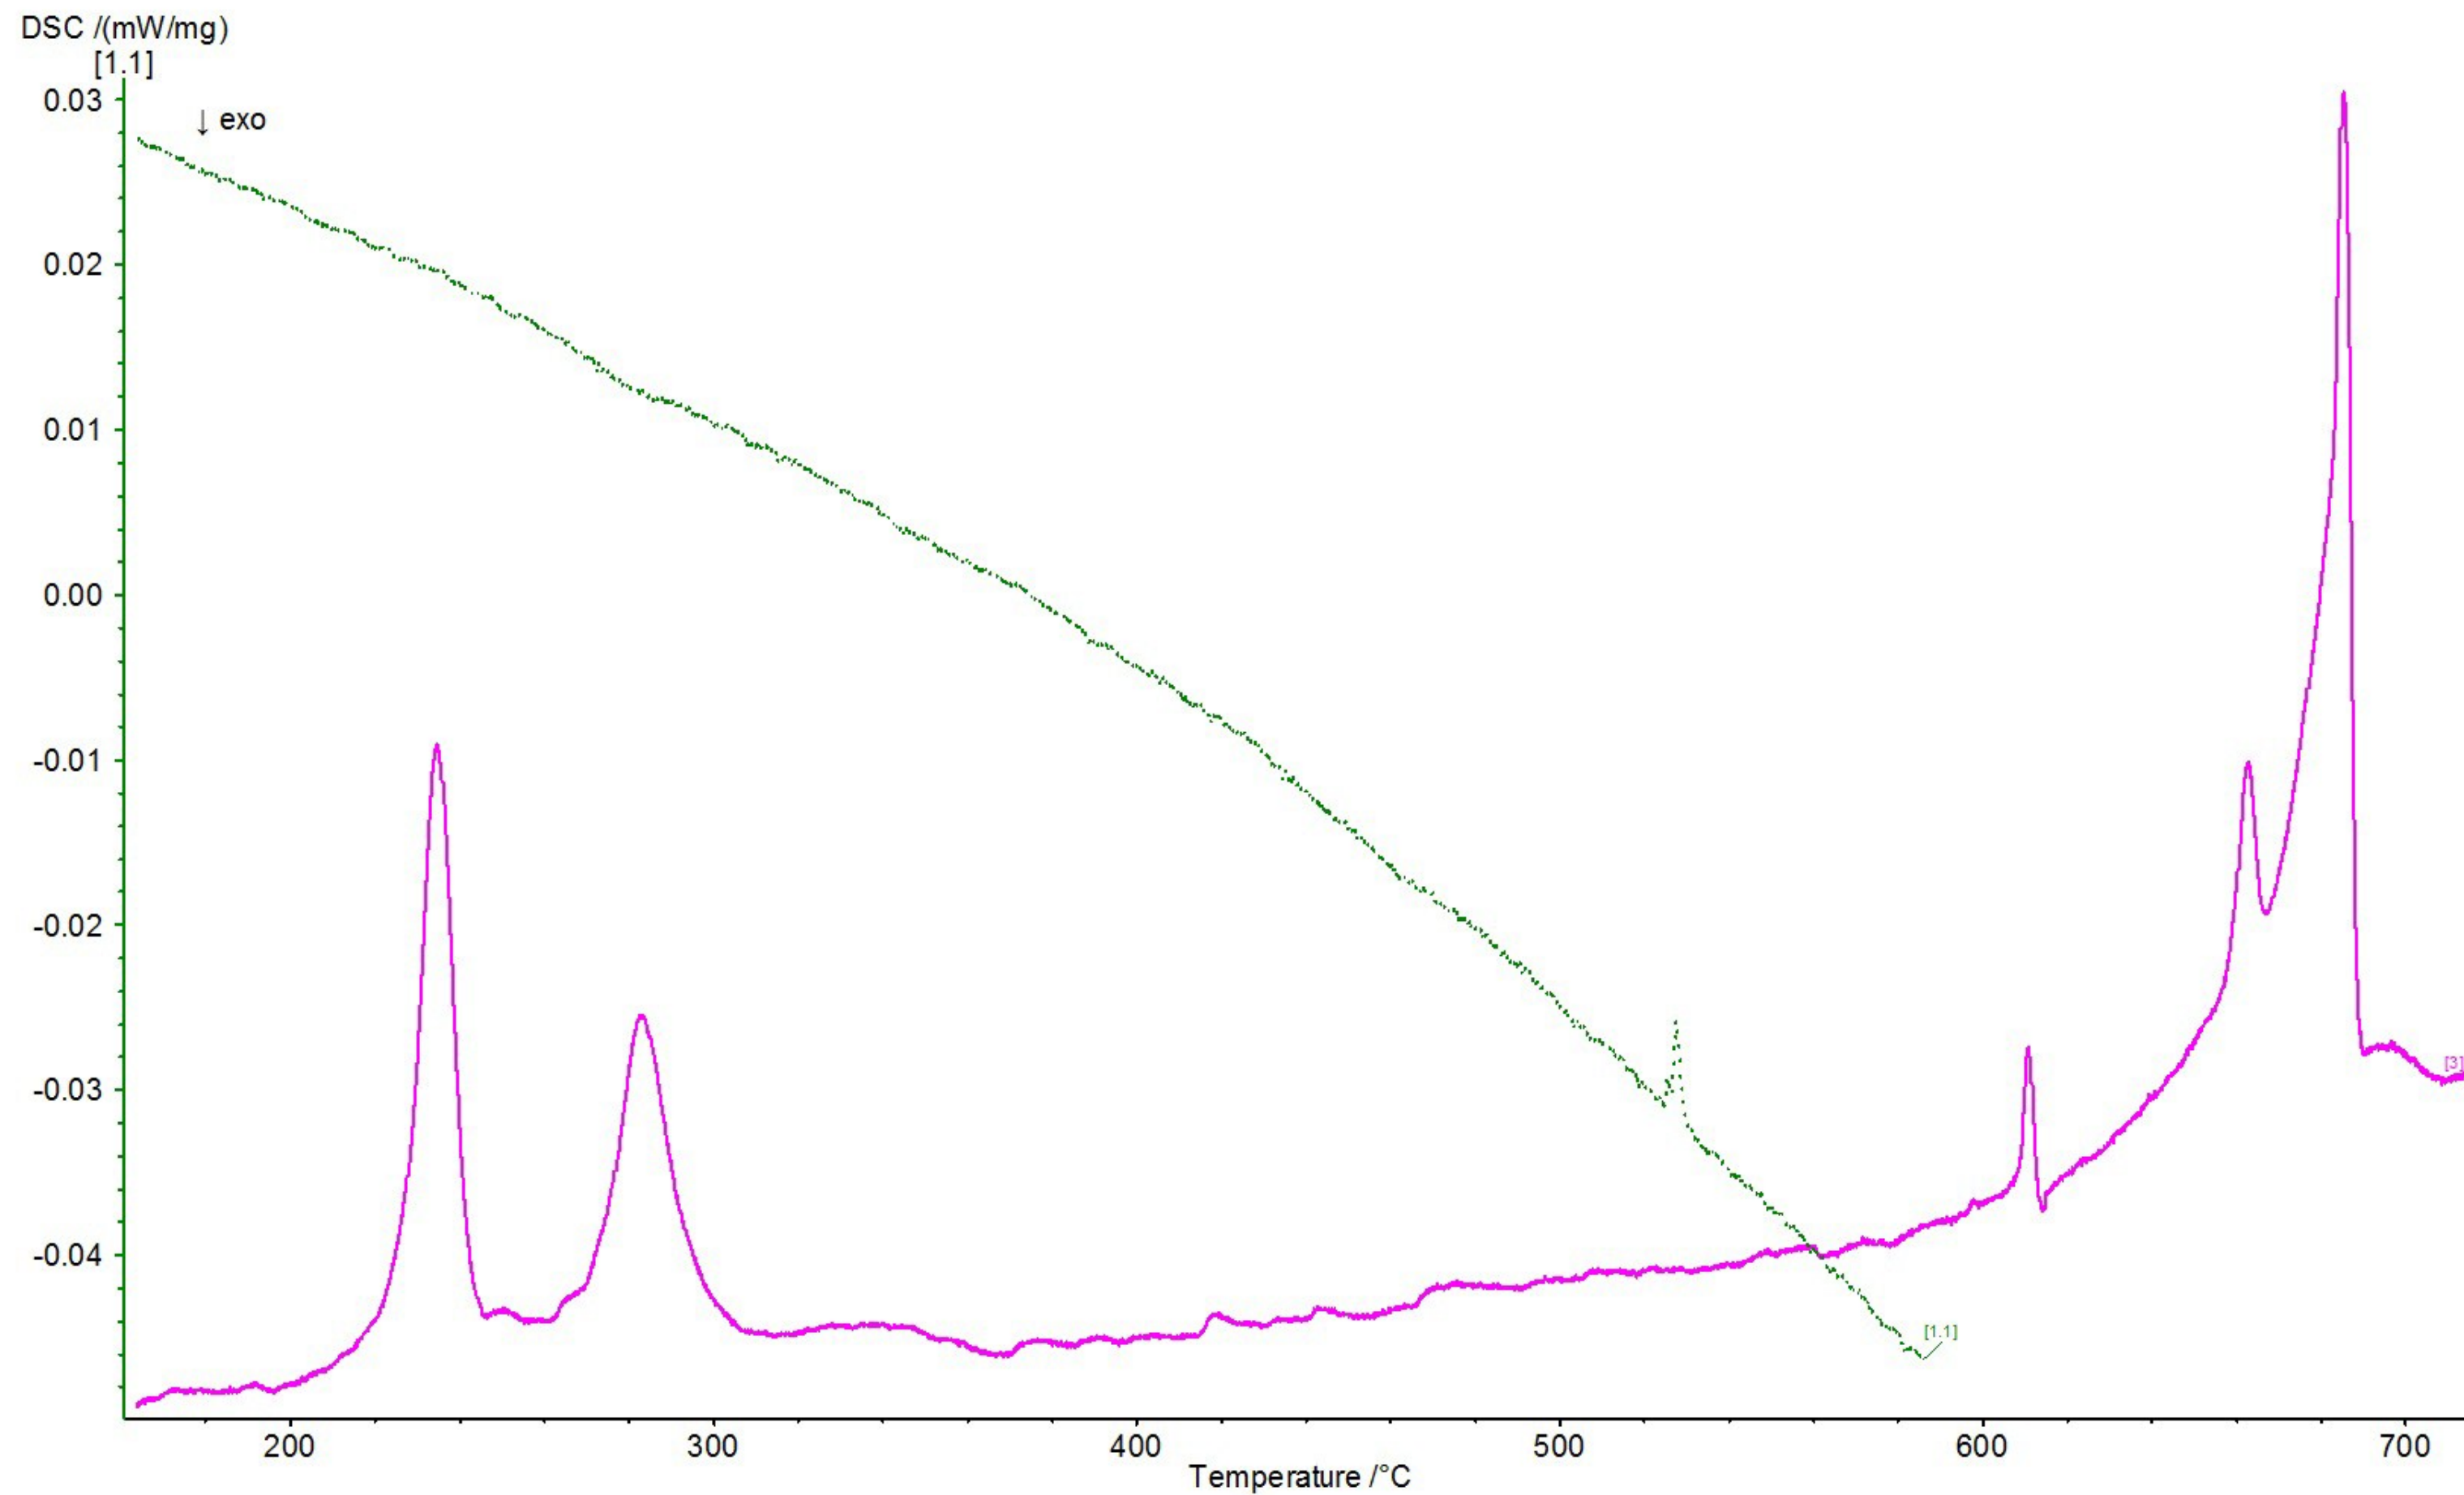

Supplement: d0nj02428g4.pdf [file d0nj02428g4.pdf]
